# Supplementary material for: Anti-inflammatory Activity of MTL-CEBPA, a Small Activating RNA Drug, in LPS-Stimulated Monocytes and Humanized Mice
Source: PubMed Central journal article supplement — Mol Ther. 2019 Feb 26;27(5):999–1016. doi: 10.1016/j.ymthe.2019.02.018 (PMC6520465; doi:10.1016/j.ymthe.2019.02.018), 2019-02-26
Supplement: mmc1.pdf [file mmc1.pdf]

## **Supplemental Information**

### **Anti-inflammatory Activity of MTL-CEBPA, a Small Activating RNA Drug, in LPS-Stimulated Monocytes and Humanized Mice**

**Jiehua Zhou, Haitang Li, Xin Xia, Alberto Herrera, Nicolette Pollock, Vikash  
Reebye, Mikael H. Sodergren, Stephanie Dorman, Bruce H. Littman, Declan Doogan, Kai-  
Wen Huang, Robert Habib, David Blakey, Nagy A. Habib, and John J. Rossi**

## Supplementary Information

Title: Anti-inflammatory activity of MTL-CEBPA, a Small Activating RNA drug, in LPS-stimulated monocytes and humanized mice

Figure S1

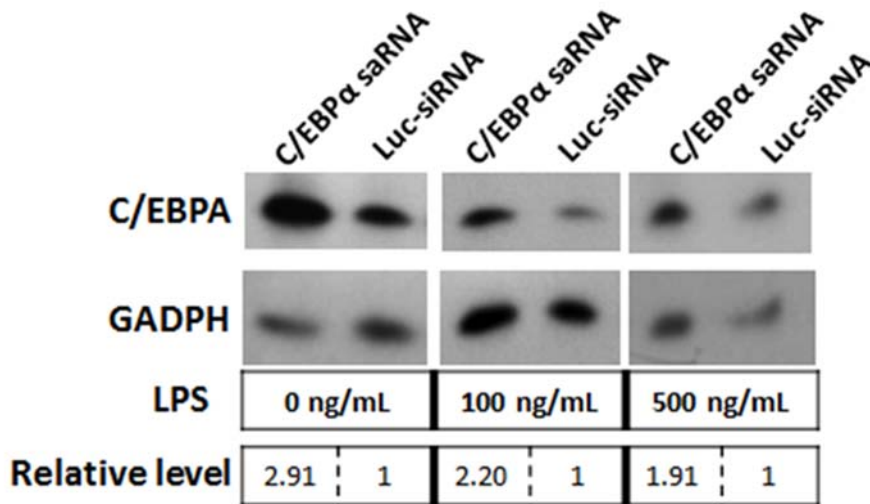

**Figure S1: CEBPA-51 induces specific gene activation in THP-1 monocytes.** A Western blot panel probed with antibody specific to CEBPA (Abcam: ab40764) showed visible increase in protein expression in THP-1 cells transfected with CEBPA-51. GAPDH expression was used as protein loading control across each of the lanes. Semi-quantitative analysis was conducted by using GelQuant.Net from triplicated blots.

**Figure S2**

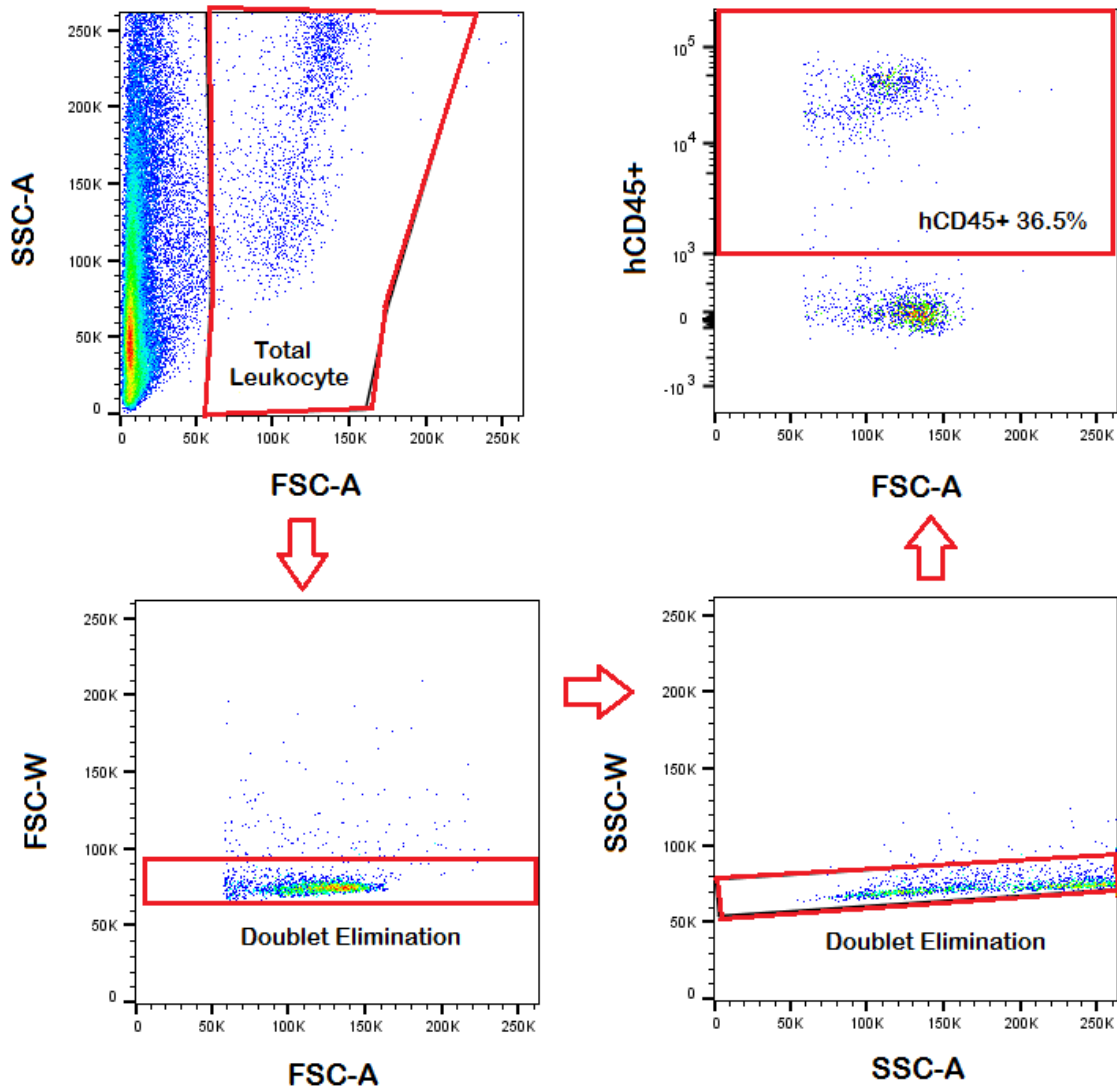

**Figure S2: Flow cytometric analysis and gating strategy of human CD45+ cell population.**

Flow cytometry was conducted to assess the human CD45+ cell population in peripheral blood of NSG mice at 10 to 12 weeks post-transplantation with fetal-liver-derived CD34+ HSCs.

Representative graphs show the gating strategy. Mouse peripheral blood cells are isolated and stained with anti-human CD45+ antibody. Total leukocytes population is gated from initial dot plot, followed by doublet elimination from forward scattering and side scattering. The percentage of hCD45+ cells are calculated by gating the positive cells from the total peripheral leukocytes. Hu-NSG mice typically present 25-75% hCD45+ engraftment.

Figure S3

A) Lymphocytes gating

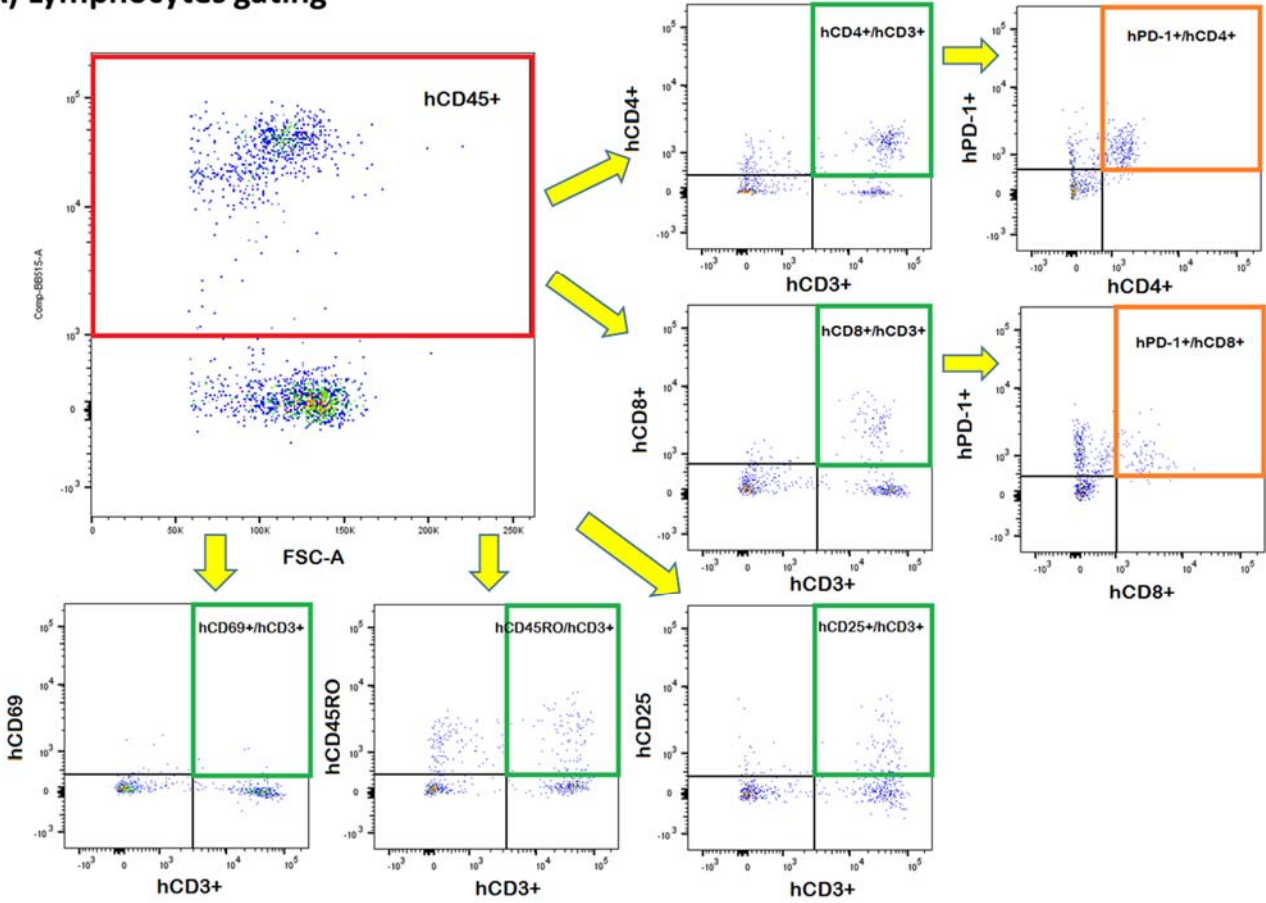

## B) Monocytes and Granulocytes gating

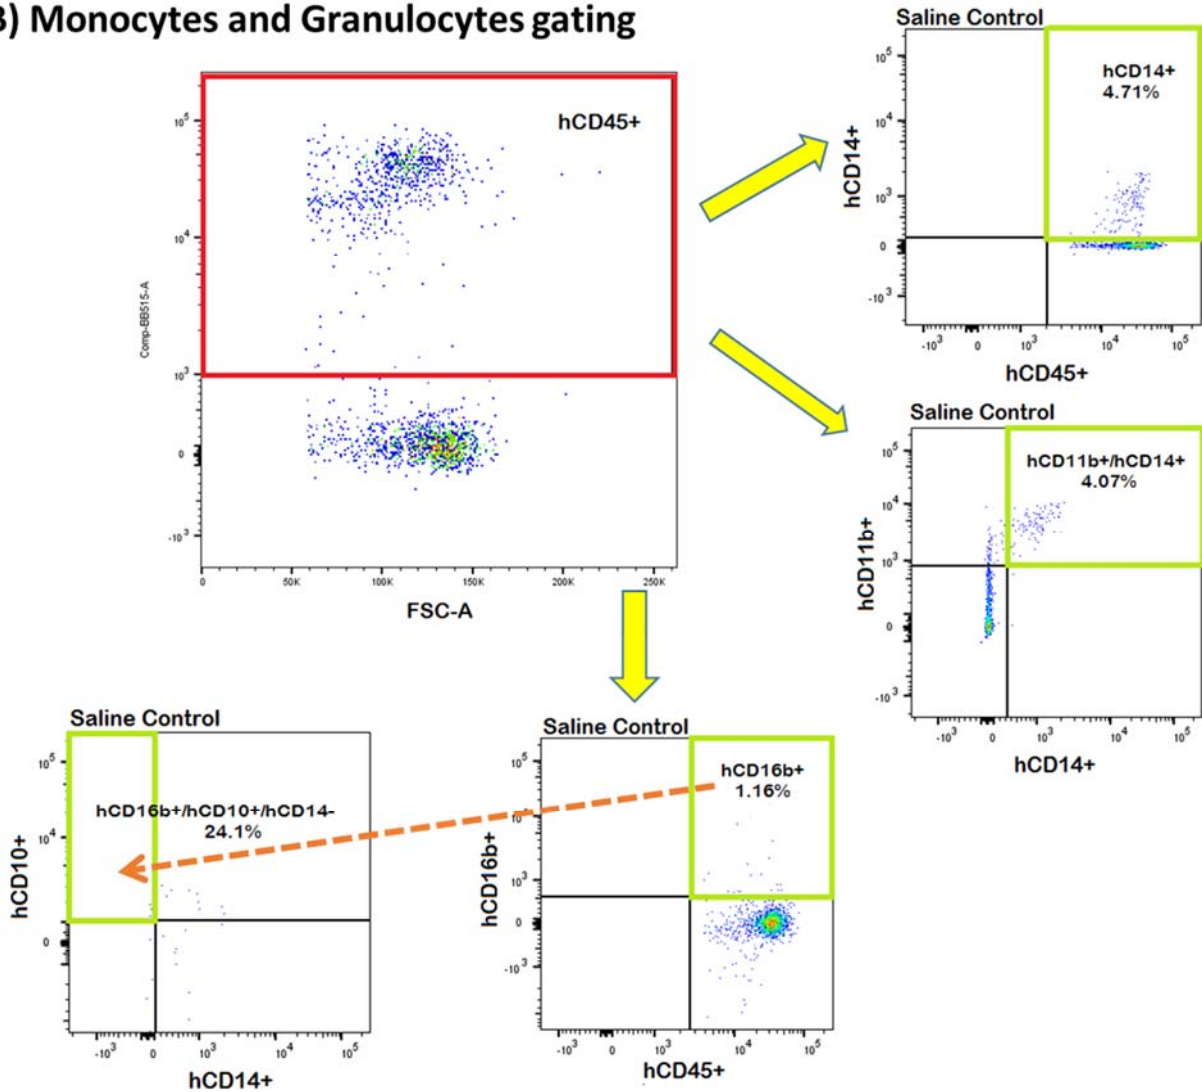

**Figure S3: Flow cytometric analysis and gating strategy of human immune cell subsets.**

Flow cytometry was conducted to assess various human immune cells subsets before or after LPS injection. Representative graphs show the gating strategy. **A)** Lymphocytes gating. The percentage of hCD4+/hCD3+, hCD8+/hCD3+, hCD45RO+/hCD3+, hCD25+/hCD3+, or hCD69+/hCD3+ population, is gated from the hCD45+ cells, respectively. The percentage of hPD-1+ subsets is gated from the hCD4+/hCD3+ or hCD8+/hCD3+ subsets, respectively. **B)** Monocytes and Granulocytes gating. The percentage of hCD14+, hCD11b+/hCD14+, or hCD16b+ population, is gated from the hCD45+ cells, respectively. The percentage of hCD16b+/hCD10+/hCD14- subset is gated from hCD16b+ population.
